# Supplementary material for: The Projection Targets of Medium Spiny Neurons Govern Cocaine-Evoked Synaptic Plasticity in the Nucleus Accumbens
Source: PubMed Central journal article supplement — Cell Rep. Author manuscript; Available in PMC 2019 Sep 9. (PMC6733522; doi:10.1016/j.celrep.2019.07.074), 2019-08-27
Supplement: NIHMS1538464-supplement-1.pdf [file NIHMS1538464-supplement-1.pdf]

**Cell Reports, Volume 28**

**Supplemental Information**

**The Projection Targets of Medium Spiny  
Neurons Govern Cocaine-Evoked Synaptic  
Plasticity in the Nucleus Accumbens**

**Corey Baimel, Laura M. McGarry, and Adam G. Carter**

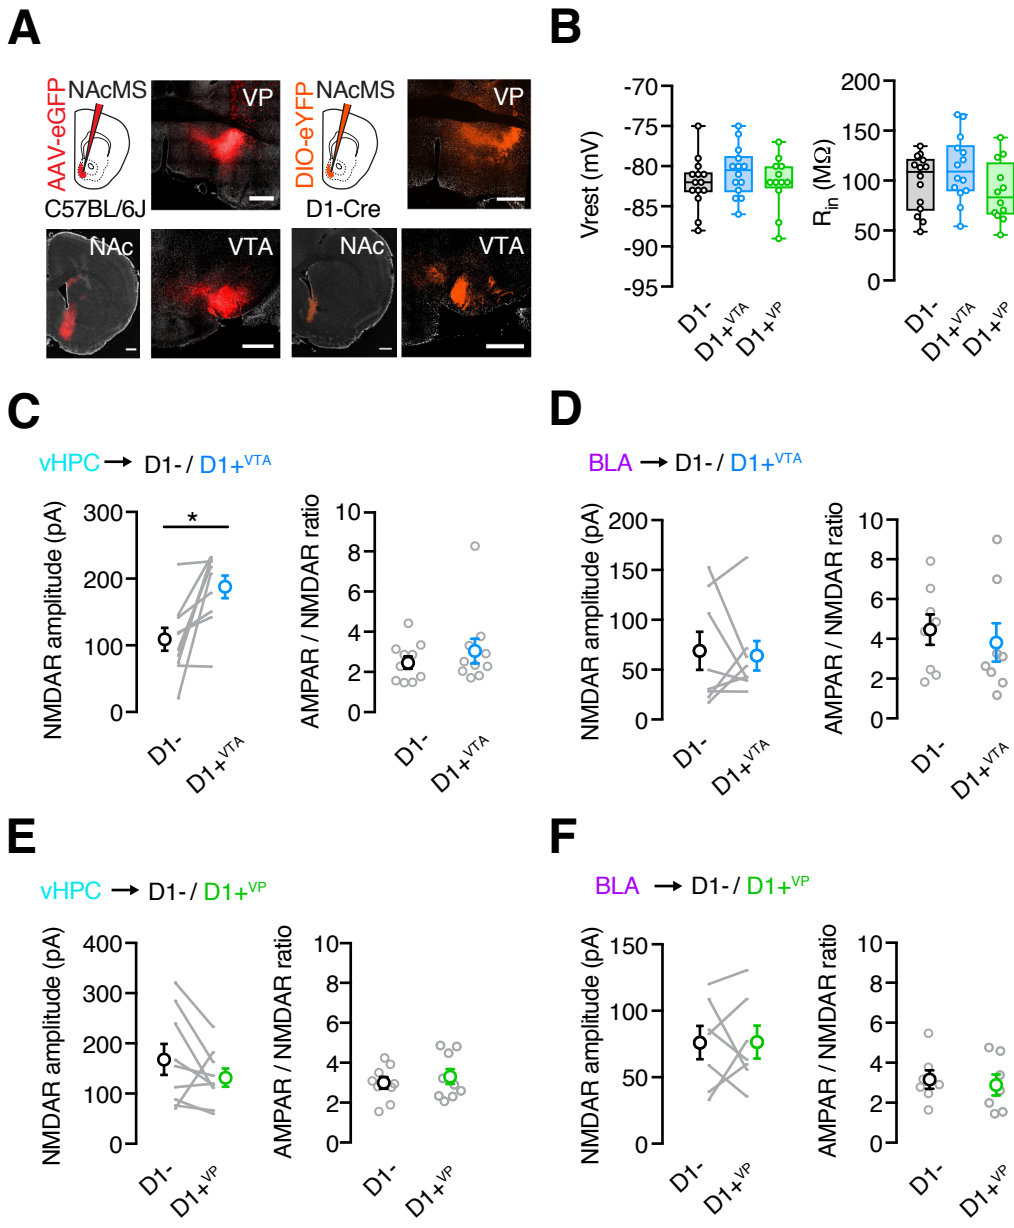

Figure S1

**Figure S1: Intrinsic properties of NAcMS neurons and baseline vHPC and BLA inputs onto D1+<sup>VTA</sup> and D1+<sup>VP</sup> MSNs. Related to Figure 1 and 2.** **A)** Schematics and representative images of AAV-eGFP or AAV-DIO-eYFP injections into the NAcMS of C57BL/6J (left, red) or D1-CRE (right, orange) mice (scale bar = 500  $\mu$ m). D1+ MSNs project to both the VP and VTA (scale bar = 500  $\mu$ m). **B)** Summary of resting membrane potential (left) and input resistance (right) of D1- (black), D1+<sup>VTA</sup> (blue), and D1+<sup>VP</sup> (green) MSNs. There were no differences for resting membrane potential (D1- =  $-82 \pm 0.9$  mV, D1+<sup>VTA</sup> =  $-81 \pm 0.8$  mV, D1+<sup>VP</sup> =  $-82 \pm 1.0$  mV; Kruskal-Wallis:  $H(2) = 1.3$ ,  $p = 0.5$ ) or input resistance (D1- =  $98 \pm 8$  M $\Omega$ , D1+<sup>VTA</sup> =  $112 \pm 9$  M $\Omega$ , D1+<sup>VP</sup> =  $89 \pm 9$  M $\Omega$ ; Kruskal-Wallis:  $H(2) = 3.2$ ,  $p = 0.2$ ) for all 3 cell types ( $n = 12-14$  cells, 8-10 mice per group). **C)** Left: summary of the absolute amplitude of vHPC-evoked NMDAR EPSCs at D1- and D1+<sup>VTA</sup> MSNs, where lines indicate pairs of recorded neurons. NMDAR EPSCs were larger at D1+<sup>VTA</sup> MSNs (NMDAR: D1- =  $109 \pm 17$  pA, D1+<sup>VTA</sup> =  $188 \pm 17$  pA; Wilcoxon test:  $W = 53$ ,  $p = 0.04$ ;  $n = 10$  pairs, 7 mice). Right: summary of the AMPAR / NMDAR ratio for vHPC-evoked EPSCs at D1- and D1+<sup>VTA</sup> MSNs. There was no difference in the AMPAR / NMDAR ratio between cell types (D1- =  $2.5 \pm 0.3$ , D1+<sup>VTA</sup> =  $3.0 \pm 0.6$ ; Wilcoxon test:  $W = 5$ ,  $p = 0.8$ ). **D)** As in (C), for vHPC-evoked EPSCs at D1- and D1+<sup>VP</sup> MSNs. NMDAR EPSCs were similar at both cell types (NMDAR: D1- =  $168 \pm 31$  pA, D1+<sup>VP</sup> =  $132 \pm 18$  pA; Wilcoxon test:  $W = -29$ ,  $p = 0.1$ ;  $n = 9$  pairs, 8 mice). There was no difference in the AMPAR / NMDAR ratio between cell types (D1- =  $3.0 \pm 0.3$ , D1+<sup>VP</sup> =  $3.3 \pm 0.4$ ; Wilcoxon test:  $W = 17$ ,  $p = 0.4$ ). **E)** As in (C), for BLA-evoked EPSCs at D1- and D1+<sup>VTA</sup> MSNs. NMDAR EPSCs were similar at both cell types (NMDAR: D1- =  $69 \pm 19$  pA, D1+<sup>VTA</sup> =  $64 \pm 15$  pA; Wilcoxon test:  $W = 0$ ,  $p > 0.9$ ;  $n = 8$  pairs, 6 mice). There was no difference in the AMPAR / NMDAR ratio between cell types (D1- =  $4.5 \pm 0.8$ , D1+<sup>VTA</sup> =  $3.8 \pm 1.0$ ; Wilcoxon test:  $W = -14$ ,  $p = 0.4$ ). **F)** As in (A), for BLA-evoked EPSCs at D1- and D1+<sup>VP</sup> MSNs. NMDAR EPSCs were similar at both cell types (NMDAR: D1- =  $76 \pm 13$  pA, D1+<sup>VP</sup> =  $77 \pm 12$  pA; Wilcoxon test:  $W = 0$ ,  $p > 0.9$ ;  $n = 7$  mice, 6 mice). There was no difference in the AMPAR / NMDAR ratio between cell types (D1- =  $3.2 \pm 0.5$ , D1+<sup>VP</sup> =  $2.9 \pm 0.5$ ; Wilcoxon test:  $W = -4$ ,  $p = 0.8$ ).

Box and whisker plots represent median and minimum to maximum.  
 Values are represented as mean  $\pm$  SEM, \*  $p < 0.05$ .

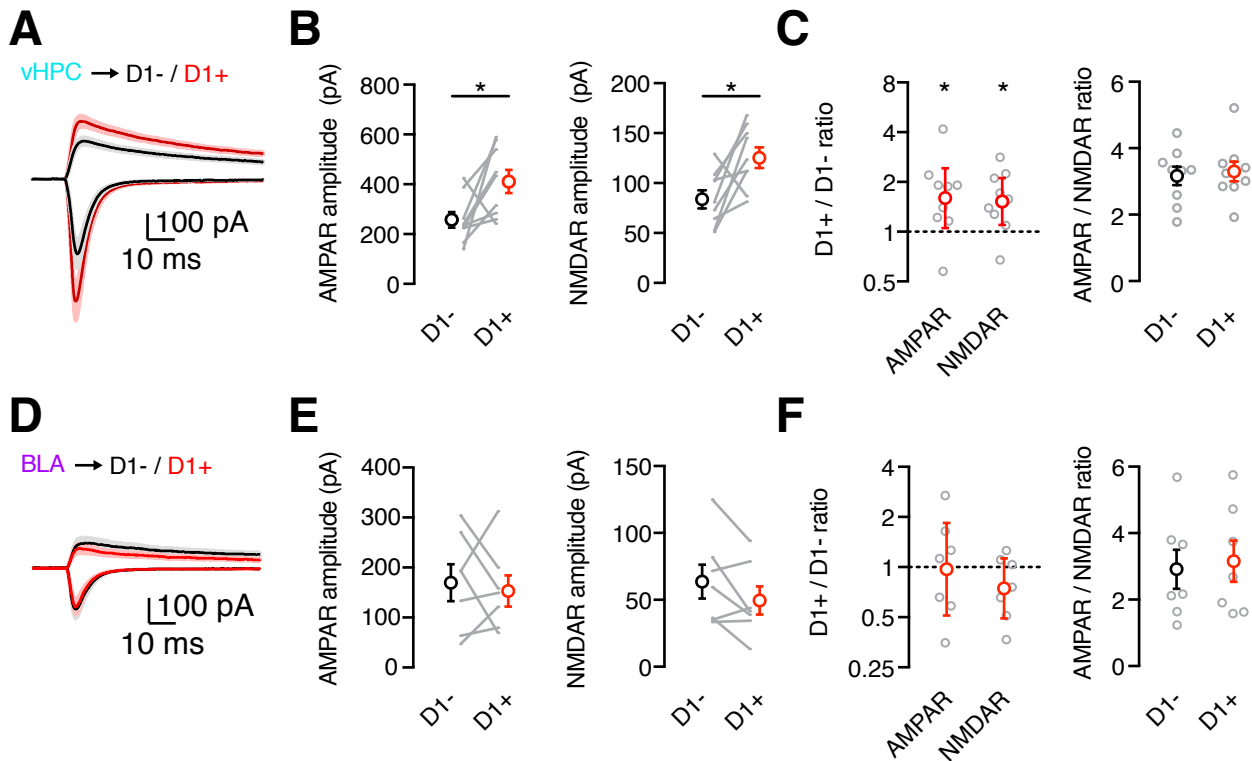

**Figure S2: Baseline connectivity onto D1- and D1+ MSNs. Related to Figure 2.** **A**) vHPC-evoked EPSCs at D1- MSNs (mean in black, SEM in grey) and D1+ MSNs (mean in red, SEM in pink) in naïve mice ( $n = 9$  pairs, 5 mice). **B**) Summary of the absolute amplitude of vHPC-evoked AMPAR (left) and NMDAR (right) EPSCs at D1- and D1+ MSNs, where lines indicate pairs of recorded neurons. AMPAR and NMDAR EPSCs were larger at D1+ MSNs (AMPA: D1- =  $258 \pm 31$  pA, D1+ =  $411 \pm 46$  pA,  $W = 35$ ,  $p = 0.04$ ; NMDAR: D1- =  $84 \pm 9$  pA, D1+ =  $125 \pm 10$  pA; Wilcoxon test:  $W = 37$ ,  $p = 0.03$ ). **C**) Left: summary of the D1+ / D1- amplitude ratio. vHPC input was biased onto D1+ MSNs for both AMPAR EPSCs (1.6, 95% CI = 1.1 – 2.4; One-sample t test:  $t(8) = 2.6$ ,  $p = 0.03$ ) and NMDAR EPSCs (1.5, 95% CI = 1.1 – 2.1; One-sample t test:  $t(8) = 3.0$ ,  $p = 0.02$ ). Right: there was no difference in the AMPAR / NMDAR ratio of vHPC input onto D1- and D1+ MSNs (D1- =  $3.2 \pm 0.3$ ; D1+ =  $3.3 \pm 0.3$ ; Wilcoxon test:  $W = -7$ ,  $p = 0.7$ ). **D**) As in (A), for BLA-evoked EPSCs. This data was collected with 1-8 ms LED durations ( $n = 7$  pairs, 5 mice). **E**) As in (B), for BLA-evoked EPSCs. EPSC amplitudes were similar onto both cell types (AMPA: D1- =  $170 \pm 37$  pA, D1+ =  $153 \pm 31$  pA,  $W = -4$ ,  $p = 0.8$ ; NMDAR: D1- =  $64 \pm 13$  pA, D1+ =  $50 \pm 11$  pA; Wilcoxon test:  $W = -16$ ,  $p = 0.2$ ). **F**) As in (C), for BLA-evoked EPSCs. There was no bias onto either cell type (AMPA: 1.0, 95% CI = 0.5 – 1.8; One-sample t test:  $t(6) = 0.6$ ,  $p = 0.6$ ; NMDAR: 0.7, 95% CI = 0.5 – 1.1; One-sample t test:  $t(6) = 1.6$ ,  $p = 0.2$ ) and no difference in the AMPAR / NMDAR ratio (D1- =  $2.9 \pm 0.6$ ; D1+ =  $3.2 \pm 0.6$ ; Wilcoxon test:  $W = 4$ ,  $p = 0.8$ ).

Values are represented as mean  $\pm$  SEM (A, B, C<sub>(right)</sub>, D, E, F<sub>(right)</sub>) or geometric mean  $\pm$  95% CI (C<sub>(left)</sub>, F<sub>(left)</sub>).

\*  $p < 0.05$ .

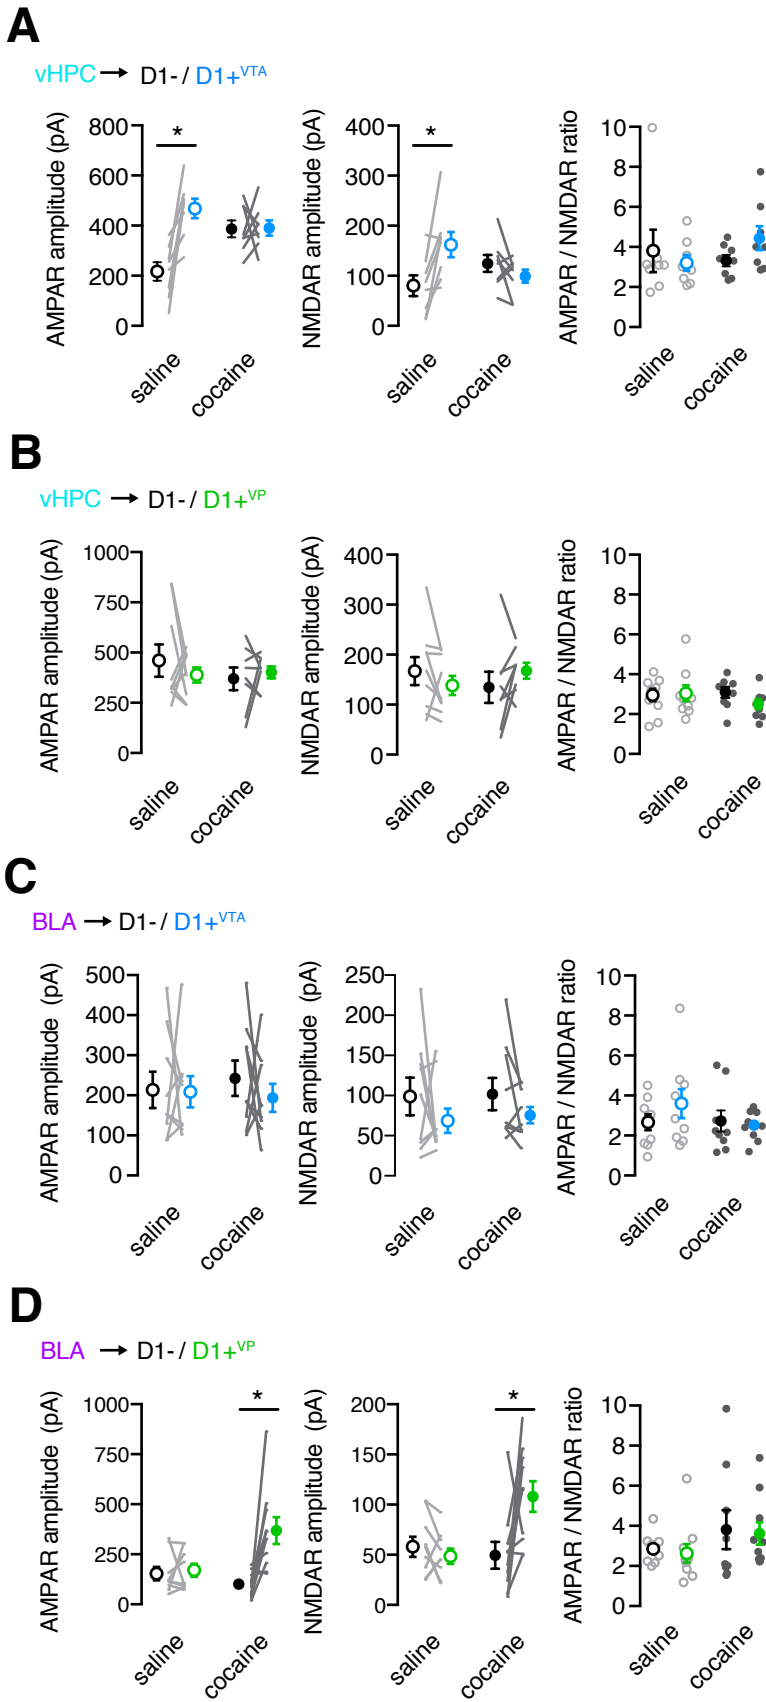

Figure S3

**Figure S3: vHPC and BLA EPSCs in saline- and cocaine-treated mice. Related to Figure 3. A)** Summary of the absolute amplitude of vHPC-evoked AMPAR EPSCs (left) and NMDAR EPSCs (middle) at D1- and D1+<sup>VTA</sup> MSNs, where lines indicate pairs of neurons. In saline mice, AMPAR and NMDAR EPSCs were larger at D1+<sup>VTA</sup> MSNs (AMPA: D1- = 217 ± 37 pA, D1+<sup>VTA</sup> = 469 ± 39.0 pA, p = 0.0006; NMDAR: D1- = 81 ± 21 pA, D1+<sup>VTA</sup> = 162 ± 25 pA, p = 0.003; n = 8 pairs, 6 mice), but were equalized in cocaine mice (AMPA: D1- = 387 ± 33 pA, D1+<sup>VTA</sup> = 390 ± 31 pA, p = 1.0; NMDAR: D1- = 125 ± 17 pA, D1+<sup>VTA</sup> = 99 ± 13 pA, p = 0.4; n = 8 pairs, 5 mice) (AMPA: Two-way ANOVA drug treatment x cell type interaction, F(1,14) = 11.1, p = 0.005; NMDAR: Two-way ANOVA drug treatment x cell type interaction, F(1,14) = 13.2, p = 0.003). Right: summary of the AMPAR / NMDAR ratio in saline and cocaine mice. There was no difference in the AMPAR / NMDAR ratio of vHPC-evoked EPSCs for D1- and D1+<sup>VTA</sup> MSNs (saline: D1- = 3.8 ± 1.1, D1+<sup>VTA</sup> = 3.2 ± 0.4, p = 0.8; cocaine: D1- = 3.3 ± 0.3, D1+<sup>VTA</sup> = 4.4 ± 0.6, p = 0.4; Two-way ANOVA drug treatment x cell type interaction, F(1,14) = 1.9, p = 0.2). **B)** Same for vHPC-evoked EPSCs at D1- and D1+<sup>VP</sup> MSNs. AMPAR and NMDAR EPSC amplitudes were unbiased at D1- and D1+<sup>VP</sup> MSNs in saline mice (AMPA: D1- = 461 ± 81 pA, D1+<sup>VP</sup> = 389 ± 38 pA, p = 0.6; NMDAR: D1- = 167 ± 28 pA, D1+<sup>VP</sup> = 139 ± 19 pA, p = 0.4; n = 9 pairs, 9 mice), this was unchanged in cocaine mice (AMPA: D1- = 370 ± 56 pA, D1+<sup>VP</sup> = 401 ± 30 pA, p = 0.9; NMDAR: D1- = 135 ± 31 pA, D1+<sup>VP</sup> = 168 ± 16 pA, p = 0.3; n = 8 pairs, 7 mice) (AMPA: Two-way ANOVA drug treatment x cell type interaction, F(1,15) = 0.90, p = 0.4; NMDAR: Two-way ANOVA drug treatment x cell type interaction, F(1,15) = 3.5, p = 0.08). There was no difference in the AMPAR / NMDAR ratio of vHPC-evoked EPSCs for D1- and D1+<sup>VP</sup> MSNs (saline: D1- = 3.0 ± 0.3, D1+<sup>VP</sup> = 3.0 ± 0.4, p = 1.0; cocaine: D1- = 3.1 ± 0.3, D1+<sup>VP</sup> = 2.5 ± 0.3, p = 0.2; Two-way ANOVA drug treatment x cell type interaction, F(1,15) = 1.8, p = 0.2). **C)** As in (A), for BLA-evoked AMPAR and NMDAR EPSCs at D1- and D1+<sup>VTA</sup> MSNs. AMPAR and NMDAR EPSC amplitudes were similar at D1- and D1+<sup>VTA</sup> MSNs in saline mice (AMPA: D1- = 214 ± 45 pA, D1+<sup>VTA</sup> = 209 ± 39 pA, p = 1.0; NMDAR: D1- = 99 ± 23 pA, D1+<sup>VTA</sup> = 69 ± 15 pA, p = 0.4; n = 9 pairs, 7 mice), this was unchanged in cocaine mice (AMPA: D1- = 243 ± 44 pA, D1+<sup>VTA</sup> = 194 ± 35 pA, p = 0.7; NMDAR: D1- = 102 ± 21 pA, D1+<sup>VTA</sup> = 76 ± 10 pA, p = 0.5; n = 9 pairs, 6 mice) (AMPA: Two-way ANOVA drug treatment x cell type interaction, F(1,16) = 0.2, p = 0.6; NMDAR: Two-way ANOVA drug treatment x cell type interaction, F(1,16) = 0.01, p = 0.9). There was no difference in the AMPAR / NMDAR ratio of BLA-evoked EPSCs for D1- and D1+<sup>VTA</sup> MSNs (saline: D1- = 2.7 ± 0.4, D1+<sup>VTA</sup> = 3.6 ± 0.7, p = 0.4; cocaine: D1- = 2.7 ± 0.5, D1+<sup>VTA</sup> = 2.5 ± 0.2, p = 1.0; Two-way ANOVA drug treatment x cell type interaction, F(1,16) = 1.3, p = 0.3). **D)** As in (A) for BLA-evoked AMPAR and NMDAR EPSCs at D1- and D1+<sup>VP</sup> MSNs. AMPAR and NMDAR EPSC amplitudes were similar at both cell types in saline mice (AMPA: D1- = 154 ± 33 pA, D1+<sup>VP</sup> = 171 ± 32 pA, p = 1.0; NMDAR: D1- = 58 ± 10 pA, D1+<sup>VP</sup> = 49 ± 8 pA, p = 0.9; n = 9 pairs, 7 mice), but were biased onto D1+<sup>VP</sup> neurons in cocaine mice (AMPA: D1- = 101 ± 19 pA, D1+<sup>VP</sup> = 368 ± 67 pA, p = 0.0005; NMDAR: D1- = 50 ± 13 pA, D1+<sup>VP</sup> = 108 ± 15 pA, p = 0.01; n = 10 pairs, 10 mice) (AMPA: Two-way ANOVA drug treatment x cell type interaction, F(1,17) = 8.1, p = 0.01; NMDAR: Two-way ANOVA drug treatment x cell type interaction, F(1,17) = 7.2, p = 0.02). There was no difference in the AMPAR / NMDAR ratio of BLA-evoked EPSCs for D1- and D1+<sup>VP</sup> MSNs (saline: D1- = 2.7 ± 0.3, D1+<sup>VP</sup> = 4.1 ± 0.9, p = 0.5; cocaine: D1- = 2.7 ± 0.5, D1+<sup>VP</sup> = 3.6 ± 0.6, p = 0.5; Two-way ANOVA drug treatment x cell type interaction, F(1,17) = 0.00003, p = 0.9).

Values are represented as mean ± SEM, \* p < 0.05.

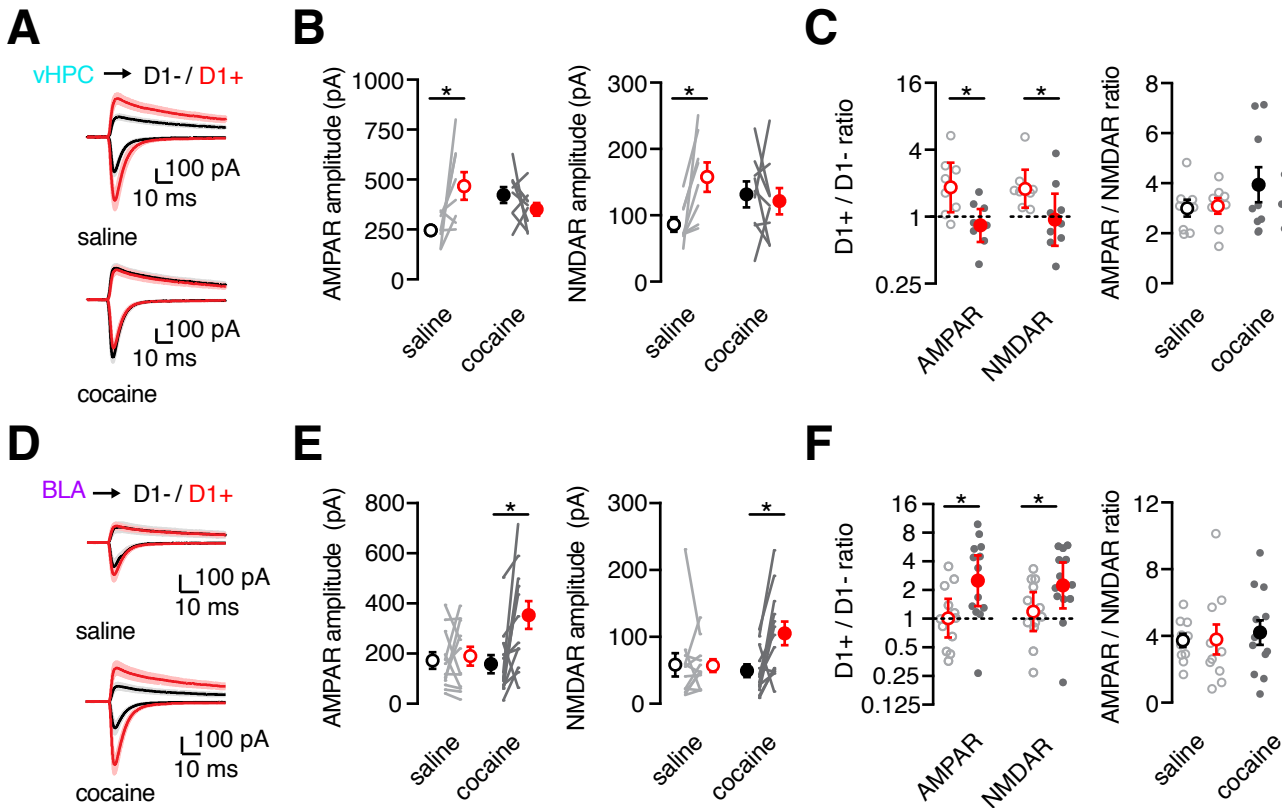

**Figure S4: Cocaine-evoked vHPC and BLA plasticity at D1- and D1+ MSNs. Related to Figure 3.** **A)** vHPC-evoked EPSCs at D1- MSNs (mean in black, SEM in grey) and D1+ MSNs (mean in red, SEM in pink) on day 6, from mice injected with saline (top) or cocaine (bottom). **B)** Summary of the absolute amplitude of vHPC-evoked AMPAR EPSCs (left) and NMDAR EPSCs (right) at D1- and D1+ MSNs, in saline (open circles) and cocaine (filled circles) mice. Lines indicate pairs of neurons (saline in light grey, cocaine in dark grey). AMPAR and NMDAR EPSCs were larger at D1+ MSNs in saline mice (AMPA: D1- =  $246 \pm 27$  pA, D1+ =  $468 \pm 69$  pA,  $p = 0.01$ ; NMDAR: D1- =  $86 \pm 11$  pA, D1+ =  $158 \pm 22$  pA,  $p = 0.02$ ;  $n = 8$  pairs, 6 mice), but amplitudes were equalized in cocaine mice (AMPA: D1- =  $423 \pm 40$  pA, D1+ =  $351 \pm 31$  pA,  $p = 0.5$ ; NMDAR: D1- =  $132 \pm 20$  pA, D1+ =  $122 \pm 20$  pA,  $p = 0.9$ ;  $n = 9$  pairs, 5 mice) (AMPA: Two-way ANOVA drug treatment x cell type interaction,  $F(1,15) = 9.1$ ,  $p = 0.009$ ; NMDAR: Two-way ANOVA drug treatment x cell type interaction,  $F(1,15) = 6.1$ ,  $p = 0.03$ ). **C)** Left: summary of the D1+ / D1- amplitude ratios for each pair of recorded neurons in saline (open circles) and cocaine (filled circles) mice. Cocaine normalized input onto D1+ and D1- MSNs for both AMPAR (left) and NMDAR (right) EPSCs (AMPA: saline D1+ / D1- ratio = 1.84, 95% CI = 1.1 - 3.1; cocaine D1+ / D1- ratio = 0.8, 95% CI = 0.6 - 1.2; Mann-Whitney:  $U = 10$ ,  $p = 0.01$ ) (NMDAR: saline D1+ / D1- ratio = 1.8, 95% CI = 1.2 - 2.6; cocaine D1+ / D1- ratio = 0.9, 95% CI = 0.5 - 1.6; Mann-Whitney:  $U = 13$ ,  $p = 0.03$ ). Right: summary of the AMPAR / NMDAR ratio for D1- and D1+ MSNs in saline (open circles) and cocaine (closed circles) mice. Cocaine exposure did not alter the AMPAR / NMDAR ratio in D1- or D1+ MSNs (saline: D1- =  $3.0 \pm 0.3$ , D1+ =  $3.1 \pm 0.3$ ,  $p = 1.0$ ; cocaine: D1- =  $4.0 \pm 0.7$ , D1+ =  $3.3 \pm 0.3$ ,  $p = 0.4$ ) (Two-way ANOVA drug treatment x cell type interaction,  $F(1,15) = 0.9$ ,  $p = 0.4$ ). **D)** As in (A), for BLA-evoked EPSCs at D1- and D1+ MSNs. This data was collected with 18 ms LED durations. **E)** As in (B), for BLA-evoked EPSCs at D1- and D1+ MSNs. AMPAR and NMDAR EPSCs were similar in saline-treated mice (AMPA: D1- =  $180 \pm 39$  pA, D1+ =  $187 \pm 44$  pA,  $p = 1.0$ ; NMDAR: D1- =  $61 \pm 20$  pA, D1+ =  $57 \pm 12$  pA,  $p = 0.9$ ;  $n = 12$  pairs, 9 mice), but were larger at D1+ MSNs in cocaine-treated mice (AMPA: D1- =  $164 \pm 38$  pA, D1+ =  $372 \pm 57$  pA,  $p = 0.001$ ; NMDAR: D1- =  $47 \pm 10$  pA, D1+ =  $102 \pm 19$  pA,  $p = 0.005$ ;  $n = 13$  pairs, 9 mice) (AMPA: Two-way ANOVA drug treatment x cell type interaction,  $F(1,23) = 6.1$ ,  $p = 0.02$ ; NMDAR: Two-way ANOVA drug treatment x cell type interaction,  $F(1,23) = 7.0$ ,  $p = 0.01$ ). **F)** Left: as in (C), for the ratio of BLA-evoked EPSCs. Cocaine increased BLA input onto D1+ MSNs for both AMPAR and NMDAR EPSCs (AMPA: saline D1+ / D1- ratio = 0.9, 95% CI = 0.5 - 1.6; cocaine D1+ / D1- ratio = 2.6, 95% CI = 1.3 - 5.2; Mann-Whitney:  $U = 25$ ,  $p = 0.02$ ) (NMDAR: saline D1+ / D1- ratio = 1.1, 95% CI = 0.6 - 2.0; cocaine D1+ / D1- ratio = 2.4, 95% CI = 1.2 - 4.5; Mann-Whitney:  $U = 29$ ,  $p = 0.04$ ). Right: there was no change in the AMPAR / NMDAR ratio after cocaine (saline: D1- =  $3.7 \pm 0.4$ , D1+ =  $3.8 \pm 0.9$ ,  $p = 1.0$ ; cocaine: D1- =  $4.2 \pm 0.7$ , D1+ =  $4.2 \pm 0.4$ ,  $p = 1.0$ ) (Two-way ANOVA drug treatment x cell type interaction,  $F(1,20) = 0.001$ ,  $p = 1.0$ ).

Values are represented as mean  $\pm$  SEM (A, B, C<sub>(right)</sub>, D, E, F<sub>(right)</sub>) or geometric mean  $\pm$  95% CI (C<sub>(left)</sub>, F<sub>(left)</sub>),  
 \*  $p < 0.05$ .

**Figure S4**
